# Supplementary material for: New water-soluble isoxazole-linked 1,3,4-oxadiazole derivative with delocalized positive charge
Source: Royal Society of Chemistry journal article supplement (doi:10.1039/d1ra05116d), 2021-01-01
Supplement: d1ra05116d1.pdf [file d1ra05116d1.pdf]

## Supplementary Information

### New water-soluble lead structure based on isoxazole-linked 1,3,4-oxadiazole derivative with delocalized positive charge

Urszula Bąchor,<sup>\*a</sup> Ewa Drozd-Szczygieł,<sup>\*a</sup> Remigiusz Bąchor,<sup>\*b</sup> Lucjan Jerzykiewicz,<sup>b</sup> Robert Wieczorek<sup>b</sup> and Marcin Mączyński<sup>a</sup>

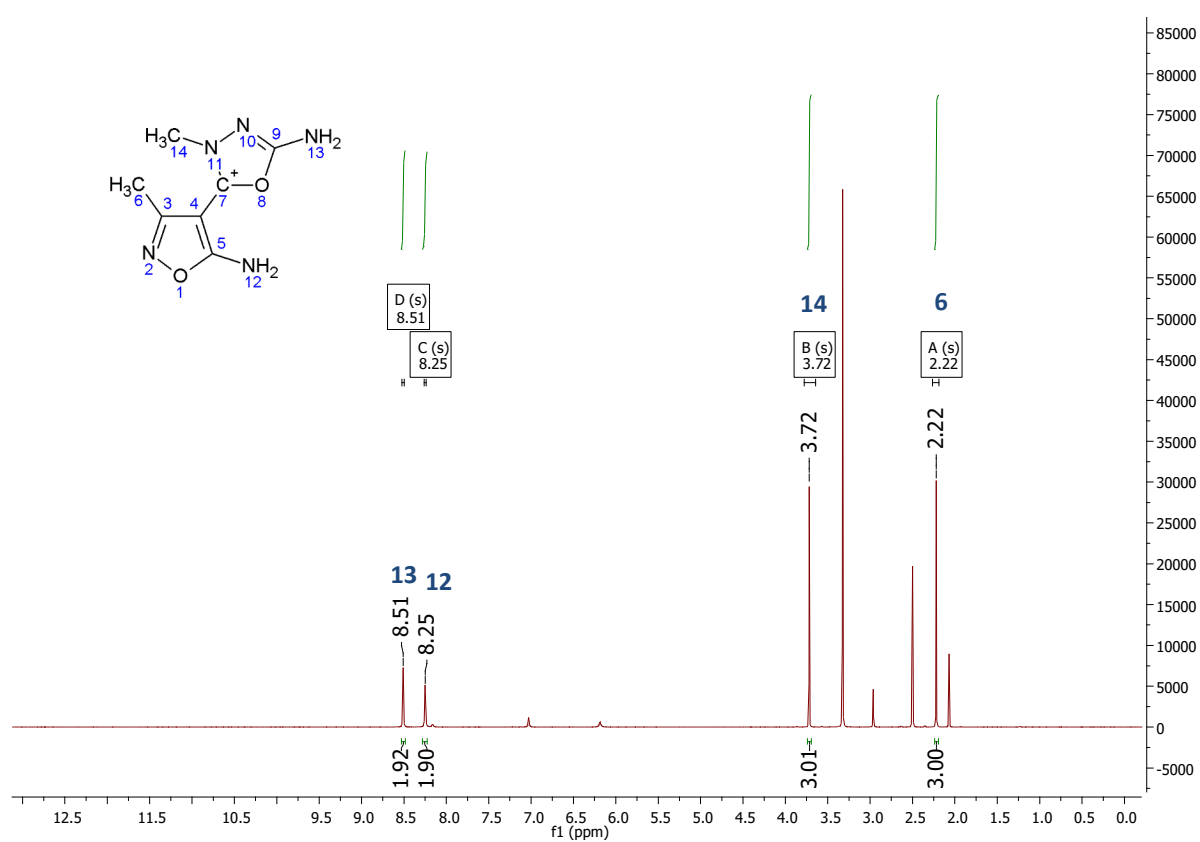

**Fig. S1.** <sup>1</sup>H NMR spectrum of the analyzed compound dissolved in DMSO-d<sub>6</sub>.

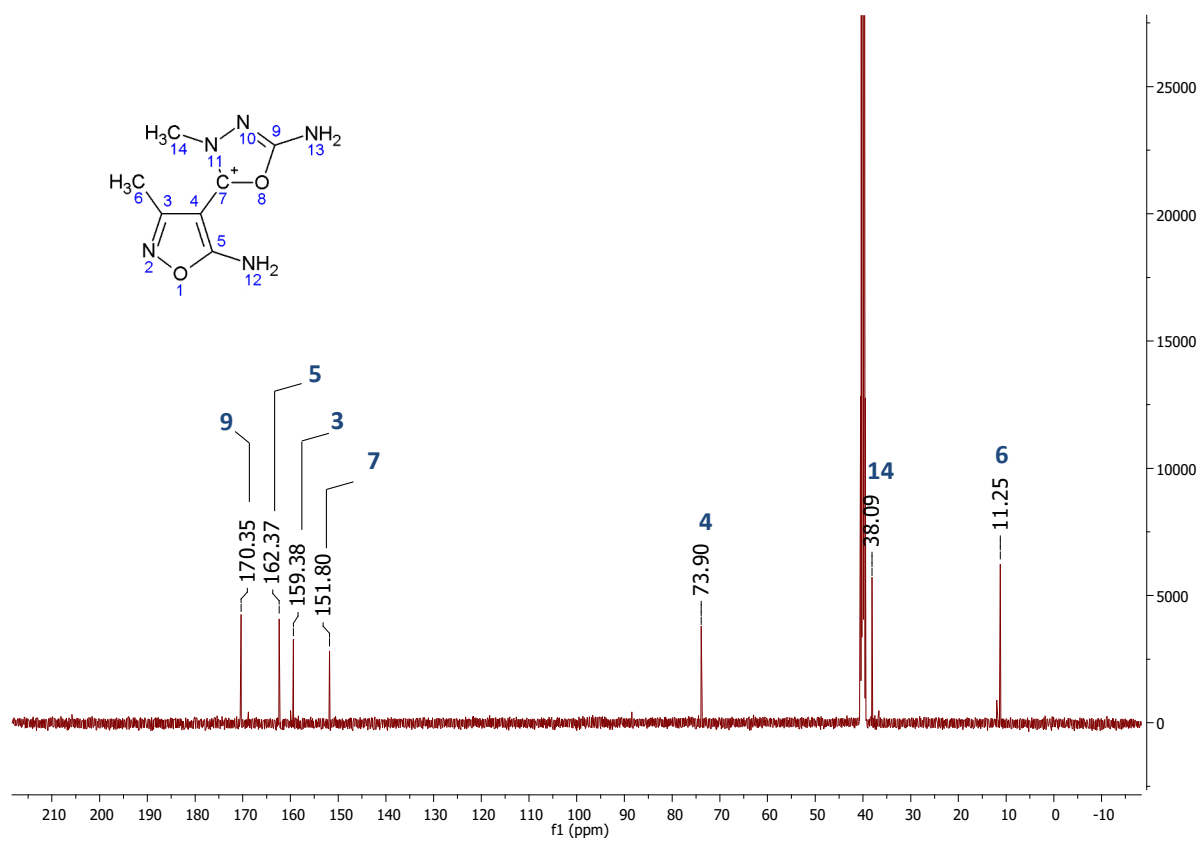

**Fig. S2.** <sup>13</sup>C NMR spectrum of the analyzed compound dissolved in DMSO-d<sub>6</sub>.

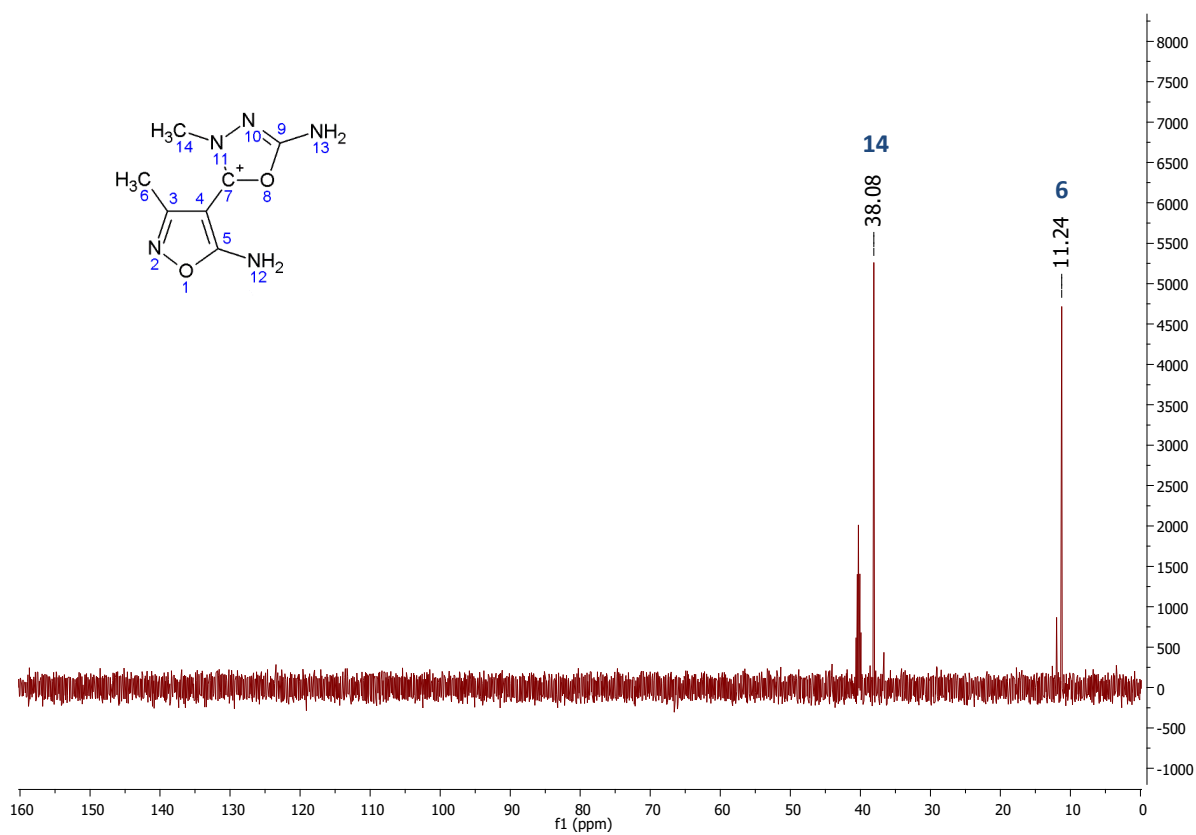

**Fig. S3.** <sup>13</sup>C NMR-DEPT135 spectrum of the analyzed compound dissolved in DMSO-d<sub>6</sub>.

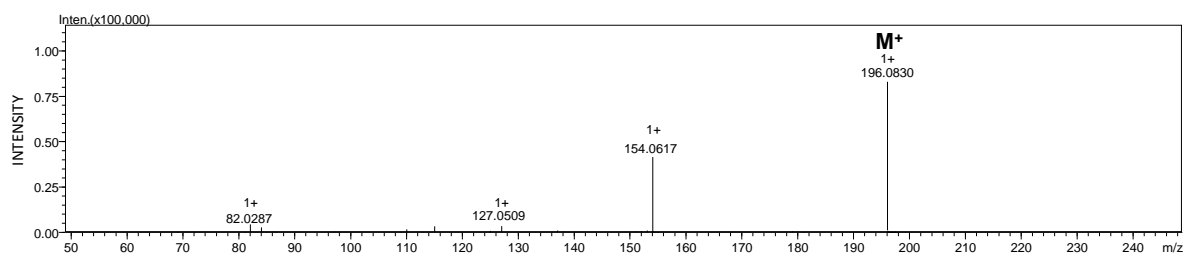

**Fig. S4.** ESI-MS/MS spectrum of analyzed compound. Parent ion  $m/z$  196.0830, collision energy 10eV.

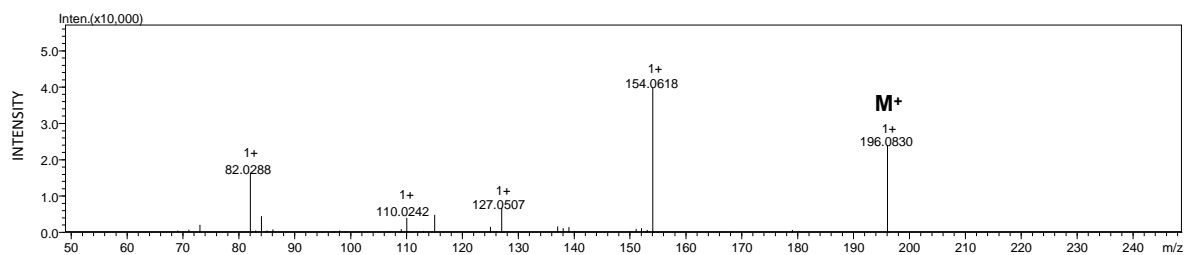

**Fig. S5.** ESI-MS/MS spectrum of analyzed compound. Parent ion  $m/z$  196.0830, collision energy 20eV.

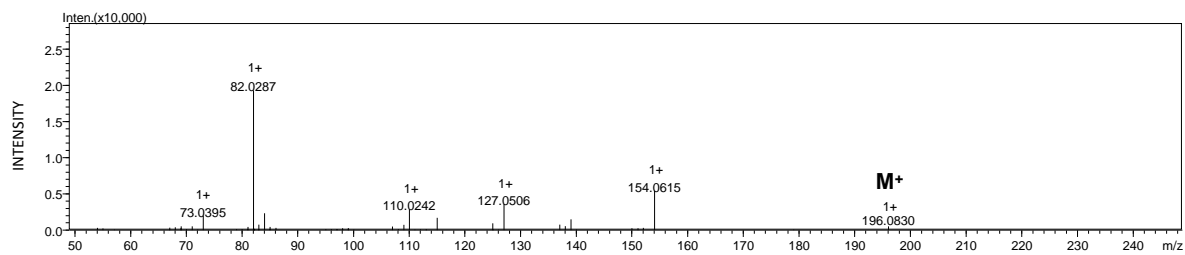

**Fig. S5.** ESI-MS/MS spectrum of analyzed compound. Parent ion  $m/z$  196.0830, collision energy 30eV.
